# Supplementary material
Source: PubMed Central journal article supplement (PMC3678555)
Supplement: NIHMS392685-supplement-1.pdf [file NIHMS392685-supplement-1.pdf]

## Online Supplemental Tables

Supplemental Table 1: Summary of cost-identification studies of hematopoietic cell transplantation in the United States after 2000

| Reference                         | Data Source                     | Population Characteristics                                                                                                     | Methods                                                                                                                                                                                                                                                                                                                                                                                                                                | Costs                                                                                                                                                                                            | Conclusions/Remarks                                                                                                                                                                                                                                                                                                       |
|-----------------------------------|---------------------------------|--------------------------------------------------------------------------------------------------------------------------------|----------------------------------------------------------------------------------------------------------------------------------------------------------------------------------------------------------------------------------------------------------------------------------------------------------------------------------------------------------------------------------------------------------------------------------------|--------------------------------------------------------------------------------------------------------------------------------------------------------------------------------------------------|---------------------------------------------------------------------------------------------------------------------------------------------------------------------------------------------------------------------------------------------------------------------------------------------------------------------------|
| Lee et al. (2000) <sup>22</sup>   | Single institution; 1994 - 1997 | N=236<br>Auto =55,<br>Allo MRD=103,<br>Allo URD=78<br><br>Multiple diagnoses<br><br>Inpatient only<br><br>Adult patients       | <i>Time horizon:</i> Hospital admission for conditioning until hospital discharge<br><i>Cost data:</i> Charges from accounting dept and medical chart review; charges converted to costs using cost-to-charge ratios; costs reported as 1997 US \$<br><i>Method notes:</i> Excluded costs incurred before admission (e.g., costs of mobilization chemo, procurement, central venous access placement); non-medical costs not included* | Median costs:<br>Auto=\$55,500<br>Allo=\$105,300<br><br>Median costs for allo patients with no complications:<br>\$90,100<br><br>Median costs for allo patients with complications:<br>\$153,500 | - Overall costs were significantly higher for allo than auto HCT<br>- Higher costs driven by occurrence of major complications (acute GVHD, VOD, infection or death)<br>- Use of mismatched donors among allo recipients was a significant pre-HCT predictor of costs                                                     |
| Saito et al. (2007) <sup>20</sup> | Single institution; 2000-2003   | N=275<br><br>Allo MA=185,<br>Allo RIC=90<br><br>Multiple diagnoses<br><br>Inpatient and outpatient costs<br><br>Adult patients | <i>Time horizon:</i> Graft infusion through 1 year post-HCT<br><i>Cost data:</i> Cost information from accounting dept and medical chart review; costs estimated using RVU methods; costs reported as 2004 US \$<br><i>Method notes:</i> Excluded search and procurement costs; non-medical costs not included                                                                                                                         | Median costs:<br>Allo MA=\$128,253<br>Allo RIC=\$80,499<br><br>Adjusting for patient factors, RIC HCT had 16 fewer hospital days and cost \$53,030 less than MA HCT                              | - For 1-year after allo HCT, RIC HCT less expensive than MA HCT with comparable clinical outcomes<br>- Costs for unrelated donor HCT significantly higher than related donor HCT<br>- HCT for patients with advanced disease more costly than those with less advanced disease                                            |
| Saito et al. (2008) <sup>21</sup> | Single institution; 2000-2004   | N=315<br><br>Allo MRD=158,<br>Allo MUD=157<br><br>Multiple diagnoses<br><br>Inpatient only<br><br>Adult patients               | <i>Time horizon:</i> Admission to 1 year post HCT<br><i>Cost data:</i> Data from hospital accounting system; costs estimated using RVU methods; costs reported as 2004 US \$<br><i>Method notes:</i> Donor identification and graft procurement costs were excluded; non-medical costs not                                                                                                                                             | Median total cost over first 100 days:<br>\$102,574<br><br>Median total cost over first year:<br>\$128,800<br><br>Average costs if no complications                                              | - Room costs, pharmacy and blood bank were largest contributors to total costs in first 100 days<br>- Pre-transplant predictors of higher costs included use of unrelated donors and advanced disease status at HCT<br>- Pre- and post- transplant, complications (grade II to IV acute GVHD, late neutrophil recovery or |

|                                     |                                                   |                                                                                                                                                                        |                                                                                                                                                                                                                                                                                                                                                              |                                                                                                                                                                                                        |                                                                                                                                                                                                                                                                                                                                             |
|-------------------------------------|---------------------------------------------------|------------------------------------------------------------------------------------------------------------------------------------------------------------------------|--------------------------------------------------------------------------------------------------------------------------------------------------------------------------------------------------------------------------------------------------------------------------------------------------------------------------------------------------------------|--------------------------------------------------------------------------------------------------------------------------------------------------------------------------------------------------------|---------------------------------------------------------------------------------------------------------------------------------------------------------------------------------------------------------------------------------------------------------------------------------------------------------------------------------------------|
|                                     |                                                   |                                                                                                                                                                        | included                                                                                                                                                                                                                                                                                                                                                     | (n=15): \$79,222                                                                                                                                                                                       | non-engraftment, VOD, alveolar hemorrhage, severe neurological toxicity, and in-hospital death) were associated with higher costs                                                                                                                                                                                                           |
| Majhail et al. (2009) <sup>19</sup> | Single Institution; 2004- 2006                    | N=294<br>Allo: MRD & UCB<br><br>MA MRD=67,<br>MA UCB=63,<br>RIC MRD=54,<br>RIC UCB=110<br><br>Multiple diagnoses<br><br>Inpatient and outpatient<br><br>Adult patients | <u>Time horizon:</u> From 30 days before until day 100 post-HCT<br><u>Cost data:</u> Cost information from institutional accounting dept<br><u>Method notes:</u> Costs included inpatient and outpatient clinic visits; excluded graft acquisition, physician services, outpatient prescription drug and home-infusion costs; non-medical costs not included | Median costs:<br>MA: \$137,112<br>RIC: \$84,824<br><br>UCB: \$137,564<br>MRD: \$83,583<br><br>Median cost per day survived:<br>MRD-MA: \$1,016<br>MRD-RIC: \$612<br>UCB-MA: \$2,082<br>UCB-RIC: \$1156 | - Room and board and pharmacy services were major contributors to total costs<br>- UCB HCT more expensive than MRD HCT and MA HCT more expensive than RIC HCT<br>- Costs for both graft sources primarily driven by severe post-transplant complications (graft failure, dialysis, and mechanical ventilation) and prolonged inpatient stay |
| Majhail et al. (2010) <sup>27</sup> | Single Institution; 2004-2006                     | N=146<br>Allo MRD=27,<br>Allo MUD=28,<br>UCB=91<br><br>Multiple diagnoses<br><br>Inpatient and outpatient<br><br>Pediatric patients                                    | <u>Time horizon:</u> From 30 days before until day 100 post-HCT<br><u>Cost data:</u> Cost information from institutional accounting dept<br><u>Method notes:</u> Costs included inpatient and outpatient clinic visits; excluded graft acquisition, physician services, outpatient prescription drug and home-infusion costs; non-medical costs not included | Mean cost per day survived:<br>MRD: \$3,446<br>MUD: \$4,050<br>UCB: \$4,522                                                                                                                            | - Costs of MUD and UCB similar while MRD HCT less costly<br>- Room and board and pharmacy services were major contributors to total costs<br>- Independent predictors of higher costs: Lansky score at transplant, graft failure post-transplant, need for dialysis, need for mechanical ventilation and VOD                                |
| Jones et al. (2008) <sup>23</sup>   | Secondary database analysis (HCUP NIS); 2000-2001 | N=8,891<br>Auto<br><br>Multiple myeloma and lymphoma<br><br>Inpatient only                                                                                             | <u>Time horizon:</u> Admission to discharge for a single hospitalization associated with HCT procedure<br><u>Cost data:</u> NIS charges converted to costs using Medicare cost-to-charge ratios for urban centers; costs reported as 2003 US \$<br><u>Method notes:</u> Patients identified                                                                  | Mean costs:<br>\$51,312                                                                                                                                                                                | - Complications (bacteremia, infections, parenteral nutrition and death) increased hospital costs<br>- TBI associated with longer hospital stay and hospital costs                                                                                                                                                                          |

|  |  |                |                                                                                                                                                     |  |  |
|--|--|----------------|-----------------------------------------------------------------------------------------------------------------------------------------------------|--|--|
|  |  | Adult patients | by ICD-9-CM diagnosis and procedure codes; could account for costs associated with the hospitalization for HCT only; non-medical costs not included |  |  |
|--|--|----------------|-----------------------------------------------------------------------------------------------------------------------------------------------------|--|--|

HCUP NIS – Healthcare Cost and Utilization Project Nationwide Inpatient Sample; HCT – hematopoietic cell transplantation; Allo – allogeneic; Auto – autologous; MRD – matched related donor; MUD – matched unrelated donor; UCB – umbilical cord blood; PB – peripheral blood stem cells; BM – bone marrow; MA – myeloablative regimen; RIC – reduced intensity conditioning regimen; RVU – relative value unit; GVHD – graft-versus-host disease; VOD – hepatic veno-occlusive disease; TBI – total body irradiation

\* Non-medical costs include patient out-of-pocket costs, transportation, lodging, caregiver time

Supplemental Table 2: Summary of cost identification studies of hematopoietic cell transplantation from countries other than the United States after 2000

| Reference                                   | Data Source                                | Population Characteristics                                                                                                                               | Methods                                                                                                                                                                                                                                                                                                                                                                                                           | Costs                                                  | Conclusions/Remarks                                                                                                                                                                                                                                                                                                                                      |
|---------------------------------------------|--------------------------------------------|----------------------------------------------------------------------------------------------------------------------------------------------------------|-------------------------------------------------------------------------------------------------------------------------------------------------------------------------------------------------------------------------------------------------------------------------------------------------------------------------------------------------------------------------------------------------------------------|--------------------------------------------------------|----------------------------------------------------------------------------------------------------------------------------------------------------------------------------------------------------------------------------------------------------------------------------------------------------------------------------------------------------------|
| Ngamkiatphaisan et al. (2007) <sup>26</sup> | Single Institution (Thailand)<br>1994-2005 | N=67<br>Allo PB=47;<br>Allo BM=4;<br>Auto PB=16<br><br>AML<br><br>Inpatient and outpatient<br><br>Pediatric and Adult patients                           | <u>Time horizon:</u> One year post-HCT<br><u>Cost data:</u> Costs were calculated from research and reports of annual cost analysis and utilization review of medical records; costs reported as 2006 US \$<br><u>Methods notes:</u> Costs included direct medical costs, including personnel costs and outpatient visits; donor costs and non-medical costs were excluded                                        | Total costs of HCT<br>Auto: \$24,171<br>Allo: \$22,593 | - Drug costs were cost driver for allo HCT<br>- Routine service costs (labor, material, capital costs and indirect costs) were cost driver of auto HCT                                                                                                                                                                                                   |
| Svahn et al. (2006) <sup>24</sup>           | Single institution (Sweden)<br>1998-1999   | N=93<br>Allo:<br>MRD=35,<br>MUD=43;<br>Mismatched<br>UD=14<br><br>Multiple diagnoses<br><br>Inpatient and outpatient<br><br>Pediatric and adult patients | <u>Time horizon:</u> 1 <sup>st</sup> day of admission through 5 years after HCT<br><u>Cost data:</u> Costs were calculated using a "cost per patient" system, where the total cost can be determined for each inpatient day for each patient, and reimbursement system of Stockholm; costs reported as 2005 €<br><u>Methods notes:</u> Costs of finding a donor were not included; non-medical costs not included | Median total costs:<br>MRD: €129,133<br>MUD: €160,658  | - Total costs in patients with acute leukemia were higher than those with all other diagnoses<br>- Complications associated with higher costs: bacteremia, VOD, and acute GVHD<br>- Costs highest during first year of transplant<br>- Similar total costs during 5-year period for MUD and MRD; cost drivers included hospitalization and complications |
| Mishra et al. (2001). <sup>30</sup>         | Single Institution (Norway)<br>1999-2000   | N=17<br>Allo: MRD & MUC,<br>PB & BM<br><br>AML, ALL, CML,<br>MDS                                                                                         | <u>Time horizon</u> Pre-HCT phase through 1 year post-HCT<br><u>Cost data:</u> Costs were obtained from medical records; overhead costs were allocated by a step-down cost allocation method<br><u>Methods notes:</u> Costs included                                                                                                                                                                              | Median total costs:<br>\$69,270                        | - In the transplant phase, mean personnel cost was 54% of total costs<br>- Correlation between length of stay and hospital cost                                                                                                                                                                                                                          |

|                                        |                                                                       |                                                                                                                             |                                                                                                                                                                                                                                                                                                                                                                                                                                                                             |                                                                            |                                                                                                                                                                                                                                                           |
|----------------------------------------|-----------------------------------------------------------------------|-----------------------------------------------------------------------------------------------------------------------------|-----------------------------------------------------------------------------------------------------------------------------------------------------------------------------------------------------------------------------------------------------------------------------------------------------------------------------------------------------------------------------------------------------------------------------------------------------------------------------|----------------------------------------------------------------------------|-----------------------------------------------------------------------------------------------------------------------------------------------------------------------------------------------------------------------------------------------------------|
|                                        |                                                                       | Inpatient only<br>Adult patients                                                                                            | inpatient costs including personnel costs and costs for search and procurement; excluded outpatient costs; non-medical costs not included                                                                                                                                                                                                                                                                                                                                   |                                                                            |                                                                                                                                                                                                                                                           |
| Esp rou et al. (2004) <sup>31</sup>    | Nineteen centers (France)<br><br>1998-2000                            | N=85<br><br>Allo: MRD PB & BM<br><br>Multiple diagnoses<br><br>Inpatient and outpatient<br><br>Pediatric and adult patients | <u>Time horizon</u> Through 24 months post-HCT<br><u>Cost data:</u> Costs collected from case report forms and hospital cost-accounting system; unit costs from one hospital were applied for all patients; costs reported as 2001  <br><u>Methods notes:</u> Included direct medical costs including donor search and procurement, outpatient visits, emergency readmission, personnel costs; non-medical costs not included                                               | Mean total costs:  76,237                                                  | - Major cost driver was total hospital days<br>- Among complications, predictors of costs were GVHD, and more than two documented infections - added costs of  20,000 to  30,000                                                                          |
| Cordonnier et al. (2005) <sup>25</sup> | Two centers (France)<br><br>1998- 2003                                | N=23<br><br>Allo MRD: MA=12 & RIC=11<br><br>Lymphoma<br><br>Inpatient and outpatient<br><br>Adult patients                  | <u>Time horizon</u> First day of hospitalization before conditioning regimen, through 12 months post-HCT or death<br><u>Cost data:</u> Costs collected from hospital accounting systems. Costs reported as 2001  <br><u>Methods notes:</u> Costs included direct medical expenses, including donor typing and procurement, personnel, readmissions in acute care or rehabilitation facilities, outpatient visits and emergency readmissions; non-medical costs not included | Mean total costs costs:<br>MRD-MA:  74,900<br>MRD-RIC:  78,700             | - Major cost driver was length of stay<br>- Mean 1-year total costs did not differ significantly between the two groups<br>- Total costs not different during the first 6 months, but were significantly higher in the RIC group during the last 6 months |
| Faucher et al. (2011) <sup>32</sup>    | Three centers (France)<br><br>Randomized trial of early discharge vs. | N=131<br><br>Auto PB HCT: Early discharge=66; Standard                                                                      | <u>Time horizon:</u> Day of PB harvest until day 60<br><u>Cost data:</u> Costs estimated by micro-costing and based on medical records; costs reported as 2005                                                                                                                                                                                                                                                                                                              | Mean total cost:<br>Early discharge:  9,777<br>Standard inpatient:  10,436 | - Cost drivers for both arms: hospitalization and medications<br>- Early discharge led to 20% decrease in post-auto HCT hospitalization costs                                                                                                             |

|                                          |                                                                          |                                                                                                                                                    |                                                                                                                                                                                                                                                                                                                                                                                                                                                                                         |                                                                                                                                                                           |                                                                                                                                                                         |
|------------------------------------------|--------------------------------------------------------------------------|----------------------------------------------------------------------------------------------------------------------------------------------------|-----------------------------------------------------------------------------------------------------------------------------------------------------------------------------------------------------------------------------------------------------------------------------------------------------------------------------------------------------------------------------------------------------------------------------------------------------------------------------------------|---------------------------------------------------------------------------------------------------------------------------------------------------------------------------|-------------------------------------------------------------------------------------------------------------------------------------------------------------------------|
|                                          | standard hospital based followup<br><br>2001- 2005                       | inpatient=65<br><br>Multiple diagnoses<br><br>Inpatient and outpatient<br><br>Adult patients                                                       | <u>Methods notes:</u> Costs included direct medical costs, including outpatient, PB harvest and labor costs; non-medical costs not included                                                                                                                                                                                                                                                                                                                                             |                                                                                                                                                                           |                                                                                                                                                                         |
| van Agthoven et al. (2001) <sup>33</sup> | Six center randomized phase III trial (The Netherlands)<br><br>1994-1998 | N=91<br><br>Auto:<br>BM=29,<br>PB=62<br><br>Lymphoma<br><br>Inpatient and outpatient<br><br>Adult patients                                         | <u>Time horizon:</u> Start of first chemotherapy course to 3 months after hospital discharge<br><u>Cost data:</u> Cost analysis was based on data collected as part of trial; determined average unit costs using micro-costing; costs reported as 1997 €<br><u>Methods notes:</u> Costs included direct medical costs, including personnel and harvesting; non-medical costs not included*                                                                                             | Mean total cost of transplant phase:<br>Auto BM: €19,000<br>Auto PB: €15,008<br><br>Mean total costs post-HCT to 3 month follow up:<br>Auto BM: €3,089<br>Auto PB: €2,088 | - Auto PB less costly than BM<br>- Hospital days were main component of total transplant costs<br>- Main costs during follow-up were blood components and hospital days |
| van Agthoven et al. (2002) <sup>34</sup> | Four centers (The Netherlands)<br><br>1994-1999                          | N=97<br><br>Allo:<br>MRD-BM=47<br>MRD-PB=21<br>MUD-BM or PB=29<br><br>AML, ALL<br><br>Inpatient and outpatient<br><br>Pediatric and adult patients | <u>Time horizon</u> From patient screening up to 2 years after HCT<br><u>Cost data:</u> Hospital information systems and patient charts; used average unit costs; costs reported as 1998 €<br><u>Methods notes:</u> Costs included direct inpatient and outpatient medical costs, including donor identification costs and costs of patients who were not transplanted after they had been planned to receive a transplant; excluded hematologist costs; non-medical costs not included | Average costs:<br>MRD BM: €98,334<br><br>MRD PB: €98,977<br><br>MUD: €151,754                                                                                             | - Major cost components were hospitalization and personnel<br>- For MUD HCT, nearly one-third of total costs were spent on donor search                                 |

HCT – hematopoietic cell transplantation; Allo – allogeneic; Auto – autologous; MRD – matched related donor; MUD – matched unrelated donor; URD – unrelated donor; MA – myeloablative regimen; RIC – reduced intensity conditioning regimen; PB – peripheral blood stem cells; BM – bone marrow; GVHD – graft-versus-host disease; VOD – hepatic veno-occlusive disease \* Non-medical costs include patient out-of-pocket costs, transportation, lodging, caregiver time

Supplemental Table 3: Summary of cost-effectiveness analyses of hematopoietic cell transplantation after 2000

| Reference                             | Data Source                                  | Population Characteristics                                                              | Methods                                                                                                                                                                                                                                                                                                                                                                                                                                                           | Incremental Cost Effectiveness Ratio                                                                                                                    | Conclusions                                                                                                                                                                                                              |
|---------------------------------------|----------------------------------------------|-----------------------------------------------------------------------------------------|-------------------------------------------------------------------------------------------------------------------------------------------------------------------------------------------------------------------------------------------------------------------------------------------------------------------------------------------------------------------------------------------------------------------------------------------------------------------|---------------------------------------------------------------------------------------------------------------------------------------------------------|--------------------------------------------------------------------------------------------------------------------------------------------------------------------------------------------------------------------------|
| Lin et al. (2010) <sup>35</sup>       | Single institution (USA)<br><br>2001- 2006   | N=140 (costs for 76)<br><br>Allo MUD: PB, BM<br><br>AML & ALL<br><br>Pediatric patients | <i>Time horizon:</i> Initial hospitalization to 1-year<br><i>Cost data:</i> Retrospective cost data from administrative records; micro-cost information from internal accounting system. Costs reported as 2008 US \$.<br><i>Methods notes:</i> Costs included direct medical costs, outpatient visits, emergency room visits; excluded donor costs. Indirect costs excluded.                                                                                     | ICER for standard-risk subgroup: -\$687,108 (favoring BM)<br><br>ICER for high risk subgroup: \$1.69 million (no clear benefit for either graft source) | -For patients with standard risk disease, BM more had lower costs and greater effectiveness than PB<br>-For patients with high-risk disease, no clear benefit of either donor source                                     |
| Kouroukis et al. (2003) <sup>36</sup> | Single institution (Canada)<br><br>1998-2000 | N=52<br><br>Auto=16<br>Melphalan and prednisone=16<br><br>Myeloma<br><br>Adult patients | <i>Time horizon:</i> Initial therapy to not specified<br><i>Cost data:</i> Retrospective cost data from administrative records; micro-costing. Costs reported as 2001 Canadian \$.<br><i>Methods notes:</i> Costs included direct medical costs, outpatient visits. Modeling done to account for anticipated future costs in auto HCT patients. Indirect costs excluded. Used an intention-to-treat basis. Survival measured the time of initial therapy to death | ICER for base case: \$18,974<br><br>ICER for drug acquisition and clinic costs of additional treatment with pamidronate: \$25,710 (favoring transplant) | - Cost per life-year gained with transplant compares positively with other interventions.<br>-Highest transplant costs related to hospitalization, chemotherapy, ICU admission and granulocyte-colony stimulating factor |
| Yu et al. (2007) <sup>11</sup>        | Single Institution (Taiwan)<br><br>1994-2002 | N=106<br><br>HiDAC-based therapy, allo, auto=54                                         | <i>Time horizon:</i> Admission through "whole treatment period" (cure or mortality)<br><i>Cost data:</i> Costs obtained from administrative database; included direct medical costs                                                                                                                                                                                                                                                                               | Treatment costs:<br>Chemotherapy: \$7607<br>HiDAC: \$13,668<br>Allo: \$29,208<br>Auto: 10,037                                                           | -HiDAC is more cost effective than allo HCT in AML patients with either intermediate or unknown cytogenetic risk<br>-Allo HCT resulted in higher                                                                         |



|                                     |                                                                                  |                                                                                         |                                                                                                                                                                                                                                                                                                                                                                                                                                       |                                                                                             |                                                                                                                                                                                                                                                                             |
|-------------------------------------|----------------------------------------------------------------------------------|-----------------------------------------------------------------------------------------|---------------------------------------------------------------------------------------------------------------------------------------------------------------------------------------------------------------------------------------------------------------------------------------------------------------------------------------------------------------------------------------------------------------------------------------|---------------------------------------------------------------------------------------------|-----------------------------------------------------------------------------------------------------------------------------------------------------------------------------------------------------------------------------------------------------------------------------|
|                                     |                                                                                  | Intensive therapy=52<br>AML & ALL<br>Adult patients                                     | including professional. Costs reported as 2003 US \$<br><u>Methods notes:</u><br>For cost effectiveness, looked at cost per life year saved for HiDAC versus Allo HCT for patients at either intermediate or unknown cytogenetic risk. Outpatient direct medical costs, direct non-medical costs were not included.                                                                                                                   | Mean cost per life year saved:<br>HiDAC: \$11,224<br>Allo: \$21,564                         | costs than HiDAC or auto HCT<br>-Age, cytogenetic risk and intensive therapy were associated with higher overall survival                                                                                                                                                   |
| Costa et al. (2007) <sup>28</sup>   | Multiple Centers (International)<br><br>Articles published between 2000 and 2005 | N=4056<br>Allo:<br>UCB=906;<br>BM/PBSC=3150<br><br>Acute leukemia<br><br>Adult patients | <u>Time horizon:</u><br>Transplantation, first-year and total 10-year cumulative costs<br><u>Cost data:</u><br>Systematic Review & Markov decision analysis model with Monte Carlo simulations<br>Discounting rate of 3% to costs and outcomes; Costs reported as 2004 US \$<br><u>Methods notes:</u><br>Costs included direct medical costs of hospitalization, inpatient and outpatient medications, nursing and physicians' costs. | ICER: (comparing to no transplant)<br>BM/PBSC: \$16,346<br>Cord blood: \$34,360             | -Most costs occur early in transplant<br>-BM/PBSC sources should be first option for unrelated donors if clinically indicated; but cord blood is a reasonable cost effective substitute                                                                                     |
| Imataki et al. (2010) <sup>12</sup> | Single institution (Japan)<br><br>2000- 2002                                     | N=50<br>Allo-RIC=15;<br>Allo-MA=35<br><br>AML or MDS<br><br>Adult patients              | <u>Time horizon:</u> Admission until discharge, up to 2 years after transplant.<br><u>Cost data:</u> Retrospective review of patient data. Direct costs analyzed using medical service fee table and national health insurance drug price table. Discount rate of 3%. Costs reported as 2006 US \$<br><u>Methods notes:</u>                                                                                                           | Median costs:<br>MA: \$29,630<br>RIC: \$29,466<br><br>ICER (MA compared to RIC): \$469/year | -Hospitalization was largest proportion of costs<br>-Transplant-related complications in MA and late complications in RIC were associated with higher costs<br>-Total hospitalization longer in conventional than RIC<br>-MA and RIC comparable in regards to cost and mean |

|                                     |                                                      |                                                                                                                              | Direct medical costs only                                                                                                                                                                                                                                                                                                                                                                                                                                                                                                                                  |                                                                                                                                                                                                                      | survival                                                                                                                                                                                                                                                                          |
|-------------------------------------|------------------------------------------------------|------------------------------------------------------------------------------------------------------------------------------|------------------------------------------------------------------------------------------------------------------------------------------------------------------------------------------------------------------------------------------------------------------------------------------------------------------------------------------------------------------------------------------------------------------------------------------------------------------------------------------------------------------------------------------------------------|----------------------------------------------------------------------------------------------------------------------------------------------------------------------------------------------------------------------|-----------------------------------------------------------------------------------------------------------------------------------------------------------------------------------------------------------------------------------------------------------------------------------|
| Fagnoni, et al (2009) <sup>29</sup> | Phase III multicentre GOELAMS 072 study<br>1994-1999 | N=197<br><br>Conventional chemotherapy (CHOP)=99;<br>Auto PBSC =98<br><br>Aggressive NHL<br><br>Pediatric and adult patients | <u>Time horizon:</u> Costs followed from first course of chemotherapy until last CHOP course or PBSC hospitalization discharge;<br><u>Cost data:</u> Per day unit prices obtained from accounting system, resources used identified and collected for each patient from clinical data; unit prices for medications based on sample of centers, whole-sale price lists, and official tariffs. Discount rate of 3%. Costs reported as 2008 €<br><u>Methods notes:</u> Hospital institution costs, only direct medical costs, including harvesting, personnel | Average overall cost per patient:<br>CHOP=€11,299<br>Auto PBSC=€46,216<br><br>ICER: €79,111 with auto PBSC<br><br>ICER for patient with high-intermediate risk according to age-adjusted IPI: €34,315 with auto PBSC | -Auto PBSC might be considered cost effective among NHL patients classified as having high-intermediate risk according to age-adjusted IPI<br>-Long-term effectiveness data were not included<br>-No indirect costs were included<br>-No quality of life information was included |

Allo-Allogeneic transplant; Auto-Autologous transplant; BM- Bone Marrow Transplant; MA-Myeloablative; MRD-Matched Related Donor; MUD-Matched Unrelated Donor; RIC- Reduced Intensity Conditioning Regimen; PBSC-Peripheral Blood Stem Cell Transplant; UCB-Umbilical Cord Blood; IPI- International Prognostic Index; Non-medical costs: Patient time costs, productivity costs
